# Supplementary material for: Analysis of Different Approaches for the Selection of Reference Genes in RT-qPCR Experiments: A Case Study in Skeletal Muscle of Growing Mice
Source: MDPI journal article supplement (doi:10.3390/ijms18051060), 2017-05-16
Supplement: s1 [file s1]

S5 Table. **Normalization factor and relative expression levels of target genes.** The mean  $\pm$  SEM of the relative expression levels of target genes for each experimental condition are shown as raw data and normalized by *RPL13A*, *YWHAZ*, *GSK3B* and *RN18S* expression levels.

| Age <sup>a</sup> | Genotype <sup>b</sup> | Relative expression levels (Mean $\pm$ SEM) |                      |                                |                     |                               |
|------------------|-----------------------|---------------------------------------------|----------------------|--------------------------------|---------------------|-------------------------------|
|                  |                       | NF <sup>c</sup>                             | <i>IGF1</i> raw data | <i>IGF1</i> norm. <sup>d</sup> | <i>GHR</i> raw data | <i>GHR</i> norm. <sup>d</sup> |
| 2w               | N                     | 2,06 $\pm$ 0,17                             | 5,75 $\pm$ 0,98      | 3,25 $\pm$ 0,31                | 1,97 $\pm$ 0,30     | 0,68 $\pm$ 0,07               |
|                  | T                     | 2,40 $\pm$ 0,22                             | 10,65 $\pm$ 1,40     | 5,06 $\pm$ 0,28                | 2,88 $\pm$ 0,46     | 0,80 $\pm$ 0,08               |
| 4w               | N                     | 1,59 $\pm$ 0,22                             | 3,94 $\pm$ 0,93      | 2,68 $\pm$ 0,40                | 1,83 $\pm$ 0,35     | 0,87 $\pm$ 0,11               |
|                  | T                     | 1,45 $\pm$ 0,18                             | 4,46 $\pm$ 0,94      | 3,46 $\pm$ 0,42                | 2,00 $\pm$ 0,29     | 0,97 $\pm$ 0,09               |
| 9w               | N                     | 1,00 $\pm$ 0,18                             | 1,00 $\pm$ 0,51      | 1,00 $\pm$ 0,27                | 1,00 $\pm$ 0,28     | 1,00 $\pm$ 0,24               |
|                  | T                     | 0,77 $\pm$ 0,11                             | 0,92 $\pm$ 0,23      | 1,37 $\pm$ 0,24                | 1,20 $\pm$ 0,14     | 1,22 $\pm$ 0,22               |

<sup>a</sup> 2w: 2-week-old, 4w: 4-week-old, 9w: 9-week-old

<sup>b</sup> N: normal, T: bGH-transgenic

<sup>c</sup> NF: normalization factor calculated as the geometric mean of the relative expression levels of *RPL13A*, *YWHAZ*, *GSK3B* and *RN18S* for each sample

<sup>d</sup> norm: normalized by NF
