# Supplementary material for: Analysis of Different Approaches for the Selection of Reference Genes in RT-qPCR Experiments: A Case Study in Skeletal Muscle of Growing Mice
Source: MDPI journal article supplement (doi:10.3390/ijms18051060), 2017-05-16
Supplement: s1 [file s1]

**S1 Table. Raw Cq values of potential reference genes determined for the same amount of total RNA.** Nine potential reference genes were analyzed by RT-qPCR in 51 skeletal muscle samples of 2-, 4- and 9-week-old normal and transgenic mice.

| Set n <sup>o</sup> | Age <sup>a</sup> | Gender <sup>b</sup> | Genotype <sup>c</sup> | Mean Cq     |            |              |            |              |              |             |             |              |               |              |
|--------------------|------------------|---------------------|-----------------------|-------------|------------|--------------|------------|--------------|--------------|-------------|-------------|--------------|---------------|--------------|
|                    |                  |                     |                       | <i>ACTB</i> | <i>B2M</i> | <i>GAPDH</i> | <i>GHR</i> | <i>GSK3B</i> | <i>HPRT1</i> | <i>IGF1</i> | <i>PPIA</i> | <i>RN18S</i> | <i>RPL13A</i> | <i>YWHAZ</i> |
| 1                  | 2w               | F                   | N                     | 23,401      | 24,189     | 22,369       | 26,586     | 24,308       | 26,156       | 25,624      | 24,182      | 11,151       | 20,439        | 30,546       |
|                    |                  | F                   | T                     | 22,505      | 24,106     | 22,167       | 25,779     | 24,434       | 26,039       | 24,819      | 23,220      | 10,832       | 20,111        | 30,472       |
|                    |                  | M                   | N                     | 22,140      | 24,075     | 22,266       | 25,449     | 24,518       | 26,013       | 25,489      | 22,977      | 10,785       | 20,702        | 30,345       |
|                    |                  | M                   | T                     | 23,080      | 25,360     | 22,129       | 25,887     | 24,303       | 29,598       | 25,279      | 23,381      | 10,713       | 20,743        | 30,852       |
|                    | 4w               | F                   | N                     | 23,434      | 24,676     | 22,589       | 25,617     | 24,277       | 31,204       | 26,306      | 24,111      | 10,951       | 21,272        | 31,620       |
|                    |                  | F                   | T                     | 23,651      | 23,529     | 23,773       | 26,026     | 24,766       | 28,489       | 25,958      | 23,951      | 11,717       | 21,164        | 30,808       |
|                    |                  | M                   | N                     | 24,564      | 24,350     | 22,971       | 25,704     | 24,143       | 26,573       | 26,348      | 24,077      | 10,330       | 21,079        | 31,106       |
|                    |                  | M                   | T                     | 23,460      | 23,501     | 24,345       | 26,211     | 25,027       | 28,314       | 26,859      | 24,675      | 11,433       | 21,309        | 31,918       |
|                    | 9w               | F                   | N                     | 29,305      | 24,956     | 25,693       | 29,134     | 25,535       | 31,245       | 29,102      | 28,167      | 13,344       | 22,806        | 32,226       |
|                    |                  | F                   | T                     | 28,201      | 24,293     | 25,443       | 26,871     | 25,093       | 29,071       | 27,855      | 25,618      | 12,783       | 22,032        | 31,842       |
|                    |                  | M                   | N                     | 30,860      | 24,252     | 25,078       | 27,572     | 25,150       | 30,806       | 29,214      | 26,887      | 13,414       | 23,000        | 31,835       |
|                    |                  | M                   | T                     | 26,922      | 23,630     | 24,762       | 26,686     | 25,430       | 28,751       | 27,340      | 26,380      | 12,881       | 22,068        | 31,983       |
| 2                  | 2w               | F                   | N                     | 22,849      | 25,306     | 22,685       | 26,307     | 24,040       | 26,105       | 25,707      | 22,990      | 11,514       | 20,358        | 31,027       |
|                    |                  | F                   | T                     | 24,094      | 24,612     | 23,392       | 26,323     | 24,729       | 26,242       | 25,719      | 23,565      | 11,135       | 20,693        | 31,088       |
|                    |                  | M                   | N                     | 23,879      | 24,651     | 21,801       | 27,752     | 24,994       | 26,572       | 26,375      | 24,377      | 10,857       | 20,747        | 31,561       |
|                    |                  | M                   | T                     | 22,040      | 26,488     | 24,307       | 25,067     | 24,267       | 25,403       | 24,766      | 22,780      | 10,101       | 20,175        | 30,625       |
|                    | 4w               | F                   | N                     | 31,373      | 24,312     | 27,014       | 27,967     | 25,699       | 30,997       | 29,242      | 27,879      | 14,737       | 22,719        | 33,067       |
|                    |                  | F                   | T                     | 23,734      | 23,389     | 23,256       | 25,878     | 24,032       | 25,807       | 25,188      | 23,749      | 11,200       | 20,716        | 31,061       |
|                    |                  | M                   | N                     | 24,336      | 24,206     | 23,041       | 26,675     | 24,588       | 26,890       | 25,203      | 24,979      | 10,759       | 20,919        | 30,838       |
|                    |                  | M                   | T                     | 26,216      | 23,316     | 25,321       | 27,932     | 25,507       | 28,255       | 27,908      | 25,603      | 12,750       | 21,166        | 31,646       |
|                    | 9w               | F                   | N                     | 26,614      | 24,296     | 23,292       | 27,183     | 25,159       | 27,461       | 28,856      | 24,956      | 12,853       | 21,920        | 31,452       |
|                    |                  | F                   | T                     | 31,451      | 26,314     | 26,995       | 27,242     | 26,300       | 30,823       | 30,270      | 28,300      | 14,505       | 23,368        | 33,019       |
|                    |                  | M                   | N                     | 23,616      | 22,735     | 22,700       | 25,057     | 24,276       | 26,148       | 26,672      | 23,602      | 11,018       | 21,282        | 31,626       |
|                    |                  | M                   | T                     | 29,410      | 23,734     | 25,663       | 27,342     | 26,337       | 29,045       | 29,727      | 26,309      | 13,311       | 22,710        | 32,929       |
| 3                  | 2w               | F                   | N                     | 24,470      | 24,457     | 24,472       | 27,196     | 25,689       | 26,940       | 26,951      | 24,932      | 12,178       | 21,413        | 31,368       |
|                    |                  | M                   | N                     | 22,919      | 27,465     | 23,297       | 26,662     | 24,817       | 26,393       | 26,454      | 23,944      | 11,113       | 20,995        | 31,209       |
|                    |                  | M                   | T                     | 23,911      | 25,808     | 24,454       | 27,404     | 25,395       | 26,879       | 26,472      | 24,552      | 11,794       | 21,403        | 31,732       |
|                    | 4w               | F                   | N                     | 24,768      | 27,409     | 24,019       | 27,273     | 25,495       | 28,375       |             | 26,852      | 12,283       | 23,330        | 32,196       |
|                    |                  | F                   | T                     | 24,120      | 23,614     | 23,984       | 25,976     | 25,180       | 26,321       | 25,916      | 23,888      | 11,437       | 21,444        | 31,680       |
|                    |                  | M                   | N                     | 23,588      | 23,359     | 24,346       | 26,373     | 25,156       | 26,929       | 26,996      | 24,469      | 11,927       | 21,493        | 31,704       |
|                    |                  | M                   | T                     | 24,826      | 24,439     | 24,795       | 27,010     | 25,674       | 27,544       | 27,219      | 25,552      | 12,363       | 21,938        | 32,973       |
|                    | 9w               | M                   | T                     | 28,115      | 24,323     | 25,672       | 27,436     | 25,279       | 27,962       | 29,037      | 25,580      | 13,599       | 22,099        | 32,374       |
| 4                  | 2w               | F                   | T                     | 23,832      | 24,208     | 23,495       | 26,092     | 24,572       | 25,967       | 25,919      | 23,166      | 11,533       | 20,621        | 30,908       |
|                    |                  | M                   | N                     | 23,551      | 24,121     | 23,007       | 26,122     | 24,417       | 25,722       | 25,117      | 23,087      | 11,286       | 20,060        | 30,671       |
|                    |                  | M                   | T                     | 22,210      | 24,566     | 22,599       | 25,315     | 23,922       | 25,345       | 24,680      | 22,910      | 10,823       | 20,250        | 30,222       |
|                    | 4w               | F                   | N                     | 27,436      | 23,799     | 24,208       | 29,153     | 24,329       | 26,148       | 26,382      | 26,667      | 11,740       | 20,735        | 31,407       |
|                    |                  | F                   | T                     | 24,950      | 24,975     | 24,815       | 26,972     | 25,482       | 27,889       | 27,098      | 25,122      | 11,967       | 22,396        | 32,375       |
|                    |                  | M                   | N                     | 25,292      | 24,761     | 23,850       | 27,320     | 25,480       | 28,236       | 27,171      | 28,995      | 11,588       | 21,973        | 32,452       |
|                    |                  | M                   | T                     | 24,867      | 26,643     | 26,262       | 28,943     | 26,780       | 29,877       | 28,870      | 27,136      | 12,468       | 23,705        | 32,893       |
|                    | 9w               | F                   | N                     | 29,033      | 25,491     | 24,837       | 28,797     | 25,883       | 27,858       | 29,764      | 27,739      | 13,035       | 22,049        | 32,670       |
|                    |                  | F                   | T                     | 26,074      | 26,365     | 25,310       | 27,456     | 25,991       | 28,333       | 28,672      | 26,366      | 12,528       | 22,502        | 32,911       |
| 5                  | 2w               | F                   | N                     | 26,480      | 28,531     | 22,339       | 28,210     | 25,985       | 28,957       | 27,954      | 26,004      | 11,686       | 23,007        | 33,150       |
|                    |                  | M                   | N                     | 25,668      | 28,379     | 22,090       | 27,519     | 25,433       | 29,881       | 27,124      | 25,457      | 11,478       | 22,990        | 33,278       |
|                    |                  | M                   | T                     | 24,384      | 27,644     | 21,767       | 27,772     | 23,877       | 27,956       | 25,564      | 24,581      | 11,188       | 22,604        | 32,150       |
|                    | 4w               | F                   | N                     | 25,717      | 26,110     | 22,110       | 27,073     | 25,085       | 27,940       | 28,090      | 25,540      | 12,363       | 21,963        | 32,022       |
|                    |                  | F                   | T                     | 26,080      | 27,213     | 22,909       | 27,047     | 25,084       | 27,779       | 26,596      | 24,627      | 12,969       | 21,837        | 31,963       |
|                    |                  | M                   | N                     | 27,050      | 27,533     | 22,657       | 28,191     | 25,556       | 29,150       | 28,220      | 26,006      | 12,661       | 23,196        | 32,984       |
|                    |                  | M                   | T                     | 26,194      | 25,768     | 22,092       | 27,245     | 25,343       | 28,557       | 26,584      | 25,182      | 12,178       | 22,833        | 32,314       |
|                    | 9w               | F                   | T                     | 28,400      | 27,916     | 25,996       | 30,028     | 27,038       | 31,171       | 30,451      | 27,511      | 15,544       | 24,272        | 33,946       |
|                    |                  | M                   | N                     | 27,755      | 27,851     | 22,949       | 27,742     | 25,546       | 30,445       | 30,719      | 26,728      | 13,171       | 24,279        | 34,485       |
|                    |                  | M                   | T                     | 25,058      | 25,613     | 25,121       | 28,281     | 25,658       | 28,976       | 28,809      | 25,913      | 14,752       | 22,190        | 32,216       |

| Mean Cq           |              |              |              |              |              |              |              |              |              |               |              |
|-------------------|--------------|--------------|--------------|--------------|--------------|--------------|--------------|--------------|--------------|---------------|--------------|
|                   | <i>ACTB</i>  | <i>B2M</i>   | <i>GAPDH</i> | <i>GHR</i>   | <i>GSK3B</i> | <i>HPRT1</i> | <i>IGF1</i>  | <i>PPIA</i>  | <i>RN18S</i> | <i>RPL13A</i> | <i>YWHAZ</i> |
| NTC <sup>d</sup>  | Undetermined | Undetermined | Undetermined | Undetermined | 36,344       | Undetermined | Undetermined | Undetermined | 34,775       | 37,704        | Undetermined |
| NRTC <sup>e</sup> | Undetermined | Undetermined | Undetermined | Undetermined | 34,152       | Undetermined | Undetermined | 36,450       | 32,944       | 37,953        | Undetermined |
| mean              | 25,731       | 25,655       | 23,970       | 27,320       | 25,881       | 27,984       | 27,545       | 25,845       | 13,512       | 22,979        | 32,226       |
| maximum           | 31,451       | 28,531       | 27,014       | 30,028       | 36,344       | 31,245       | 30,719       | 36,450       | 34,775       | 37,953        | 34,485       |
| minimum           | 22,040       | 22,735       | 21,767       | 25,057       | 23,877       | 25,345       | 24,680       | 22,780       | 10,101       | 20,060        | 30,222       |
| 25% percentile    | 23,634       | 24,155       | 22,671       | 26,167       | 24,476       | 26,357       | 25,917       | 23,947       | 11,170       | 20,833        | 31,097       |
| 75% percentile    | 26,768       | 26,212       | 24,826       | 27,657       | 25,541       | 29,011       | 28,559       | 26,337       | 12,818       | 22,657        | 32,413       |

<sup>a</sup> 2w: 2-week-old, 4w: 4-week-old, 9w: 9-week-old

<sup>b</sup> F: female, M: male

<sup>c</sup> N: normal, T: bGH-transgenic

<sup>d</sup> NTC: non-template control

<sup>e</sup> NRTC: no-reverse transcription control
