# Supplementary material for: Analysis of Different Approaches for the Selection of Reference Genes in RT-qPCR Experiments: A Case Study in Skeletal Muscle of Growing Mice
Source: MDPI journal article supplement (doi:10.3390/ijms18051060), 2017-05-16

**Figure S2:** Gel electrophoresis of RT-qPCR products. The banding pattern observed on a 2% agarose gel confirmed the amplification of unique products of expected size by each primer pair.

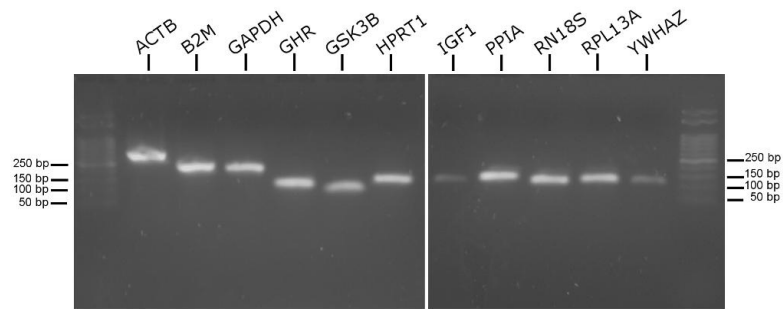

Supplement: s1 [file s1]
