# Supplementary material for: Analysis of Different Approaches for the Selection of Reference Genes in RT-qPCR Experiments: A Case Study in Skeletal Muscle of Growing Mice
Source: MDPI journal article supplement (doi:10.3390/ijms18051060), 2017-05-16
Supplement: s1 [file s1]

S3 Table. **Relative expression levels of potential reference genes determined for the same amount of total RNA.** The mean  $\pm$  SEM of the relative expression levels of reference genes for each experimental condition are shown.

| Age <sup>a</sup> | Genotype <sup>b</sup> | Relative expression levels (Mean $\pm$ SEM) |                 |                 |                 |                 |                 |                 |                 |                 |
|------------------|-----------------------|---------------------------------------------|-----------------|-----------------|-----------------|-----------------|-----------------|-----------------|-----------------|-----------------|
|                  |                       | <i>ACTB</i>                                 | <i>B2M</i>      | <i>GAPDH</i>    | <i>GSK3B</i>    | <i>HPRT1</i>    | <i>PPIA</i>     | <i>RN18S</i>    | <i>RPL13A</i>   | <i>YWHAZ</i>    |
| 2w               | N                     | 5,51 $\pm$ 1,32                             | 0,65 $\pm$ 0,11 | 2,14 $\pm$ 0,36 | 1,24 $\pm$ 0,17 | 2,57 $\pm$ 0,38 | 2,89 $\pm$ 0,51 | 2,46 $\pm$ 0,22 | 2,64 $\pm$ 0,30 | 2,03 $\pm$ 0,24 |
|                  | T                     | 7,87 $\pm$ 1,81                             | 0,58 $\pm$ 0,11 | 1,73 $\pm$ 0,36 | 1,55 $\pm$ 0,16 | 3,04 $\pm$ 0,59 | 3,71 $\pm$ 0,50 | 2,83 $\pm$ 0,39 | 2,82 $\pm$ 0,32 | 2,47 $\pm$ 0,23 |
| 4w               | N                     | 2,27 $\pm$ 0,59                             | 0,98 $\pm$ 0,17 | 1,24 $\pm$ 0,21 | 1,21 $\pm$ 0,14 | 1,47 $\pm$ 0,35 | 1,19 $\pm$ 0,28 | 1,94 $\pm$ 0,36 | 1,79 $\pm$ 0,30 | 1,51 $\pm$ 0,25 |
|                  | T                     | 2,69 $\pm$ 0,52                             | 1,33 $\pm$ 0,23 | 0,85 $\pm$ 0,14 | 1,02 $\pm$ 0,14 | 1,61 $\pm$ 0,41 | 1,89 $\pm$ 0,35 | 1,51 $\pm$ 0,18 | 1,83 $\pm$ 0,31 | 1,56 $\pm$ 0,30 |
| 9w               | N                     | 1,00 $\pm$ 0,77                             | 1,00 $\pm$ 0,33 | 1,00 $\pm$ 0,31 | 1,00 $\pm$ 0,16 | 1,00 $\pm$ 0,47 | 1,00 $\pm$ 0,48 | 1,00 $\pm$ 0,33 | 1,00 $\pm$ 0,19 | 1,00 $\pm$ 0,16 |
|                  | T                     | 0,55 $\pm$ 0,27                             | 0,79 $\pm$ 0,18 | 0,30 $\pm$ 0,05 | 0,68 $\pm$ 0,09 | 0,56 $\pm$ 0,13 | 0,66 $\pm$ 0,14 | 0,52 $\pm$ 0,09 | 1,11 $\pm$ 0,29 | 1,00 $\pm$ 0,26 |

<sup>a</sup> 2w: 2-week-old, 4w: 4-week-old, 9w: 9-week-old

<sup>b</sup> N: normal, T: bGH-transgenic
