# Supplementary material for: Analysis of Different Approaches for the Selection of Reference Genes in RT-qPCR Experiments: A Case Study in Skeletal Muscle of Growing Mice
Source: MDPI journal article supplement (doi:10.3390/ijms18051060), 2017-05-16
Supplement: s1 [file s1]

S4 Table. **Relative expression levels of potential reference genes determined for the same amount of isolated mRNA.** The mean  $\pm$  SEM of the relative expression levels of reference genes for each experimental condition are shown.

| Age <sup>a</sup> | Genotype <sup>b</sup> | Relative expression levels (Mean $\pm$ SEM) |                 |                 |                 |                 |                 |                 |                 |
|------------------|-----------------------|---------------------------------------------|-----------------|-----------------|-----------------|-----------------|-----------------|-----------------|-----------------|
|                  |                       | <i>ACTB</i>                                 | <i>B2M</i>      | <i>GAPDH</i>    | <i>GSK3B</i>    | <i>HPRT1</i>    | <i>PPIA</i>     | <i>RPL13A</i>   | <i>YWHAZ</i>    |
| 2w               | N                     | 11,67 $\pm$ 5,12                            | 1,34 $\pm$ 0,30 | 3,63 $\pm$ 1,26 | 2,26 $\pm$ 0,61 | 4,10 $\pm$ 1,34 | 4,51 $\pm$ 1,34 | 2,48 $\pm$ 0,70 | 5,37 $\pm$ 1,32 |
| 4w               | N                     | 2,95 $\pm$ 0,61                             | 2,05 $\pm$ 0,24 | 2,30 $\pm$ 0,56 | 1,27 $\pm$ 0,38 | 2,25 $\pm$ 0,46 | 2,40 $\pm$ 0,41 | 1,77 $\pm$ 0,33 | 1,38 $\pm$ 0,38 |
| 9w               | N                     | 1,00 $\pm$ 0,30                             | 1,00 $\pm$ 0,06 | 1,00 $\pm$ 0,19 | 1,00 $\pm$ 0,21 | 1,00 $\pm$ 0,20 | 1,00 $\pm$ 0,18 | 1,00 $\pm$ 0,08 | 1,00 $\pm$ 0,09 |

<sup>a</sup> 2w: 2-week-old, 4w: 4-week-old, 9w: 9-week-old

<sup>b</sup> N: normal
