# Supplementary material for: Analysis of Different Approaches for the Selection of Reference Genes in RT-qPCR Experiments: A Case Study in Skeletal Muscle of Growing Mice
Source: MDPI journal article supplement (doi:10.3390/ijms18051060), 2017-05-16
Supplement: s1 [file s1]

S2 Table. **Raw Cq values of potential reference genes determined for the same amount of isolated mRNA.** Eight potential reference genes were analyzed by RT-qPCR in 17 skeletal muscle samples of 2-, 4- and 9-week-old normal mice.

| Set nº            | Age <sup>a</sup> | Gender <sup>b</sup> | Genotype <sup>c</sup> | Mean Cq      |              |              |              |              |              |        |              |
|-------------------|------------------|---------------------|-----------------------|--------------|--------------|--------------|--------------|--------------|--------------|--------|--------------|
|                   |                  |                     |                       | ACTB         | B2M          | GAPDH        | GSK3B        | HPRT1        | PPIA         | RPL13A | YWHAZ        |
| 1                 | 2w               | F                   | N                     | 31,137       | 23,945       | 25,973       | 30,299       | 28,143       | 26,703       | 23,253 | 33,238       |
|                   |                  | M                   | N                     | 25,934       | 22,594       | 23,056       | 27,012       | 26,062       | 24,495       | 21,181 | 31,481       |
|                   | 4w               | F                   | N                     | 26,484       | 23,942       | 22,812       | 27,265       | 26,003       | 24,724       | 21,398 | 32,050       |
|                   |                  | M                   | N                     | 25,818       | 22,537       | 23,077       | 27,857       | 25,999       | 24,350       | 21,082 | 31,008       |
|                   | 9w               | F                   | N                     | 31,980       | 24,151       | 26,066       | 29,485       | 29,618       | 27,265       | 23,938 | 33,211       |
|                   |                  | M                   | N                     | 30,698       | 23,916       | 25,927       | 29,673       | 28,978       | 26,765       | 22,937 | 33,221       |
| 2                 | 2w               | F                   | N                     | 28,726       | 22,562       | 24,355       | 29,353       | 27,482       | 25,903       | 22,129 | 35,028       |
|                   |                  | M                   | N                     | 30,196       | 22,960       | 25,551       | 29,411       | 28,842       | 27,049       | 22,980 | 34,906       |
|                   | 4w               | F                   | N                     | 28,264       | 22,783       | 23,807       | 27,490       | 27,286       | 25,839       | 21,903 | 33,335       |
|                   |                  | F                   | N                     | 29,509       | 23,606       | 25,854       | 30,374       | 28,691       | 27,035       | 23,574 | 35,736       |
|                   | 9w               | M                   | N                     | 28,710       | 22,332       | 23,901       | 29,387       | 27,251       | 25,806       | 22,104 | 33,282       |
|                   |                  |                     |                       |              |              |              |              |              |              |        |              |
| 3                 | 2w               | F                   | N                     | 31,303       | 23,576       | 25,622       | 30,124       | 28,415       | 27,119       | 22,968 | 34,425       |
|                   |                  | M                   | N                     | 34,021       | 23,678       | 27,297       | 30,090       | 31,497       | 29,096       | 23,833 | 34,239       |
|                   | 4w               | F                   | N                     | 29,393       | 23,944       | 24,988       | 29,052       | 27,944       | 26,756       | 22,957 | 34,135       |
|                   |                  | M                   | N                     | 30,585       | 24,043       | 25,918       | 29,141       | 29,335       | 27,967       | 23,159 | 34,428       |
|                   | 9w               | F                   | N                     | 30,242       | 24,049       | 25,342       | 29,191       | 28,663       | 27,516       | 23,351 | 34,621       |
|                   |                  | M                   | N                     | 30,392       | 23,928       | 26,107       | 30,190       | 28,885       | 27,425       | 23,222 | 35,017       |
| mean              |                  |                     |                       | 29,611       | 23,444       | 25,038       | 29,141       | 28,182       | 26,577       | 22,704 | 33,727       |
| maximum           |                  |                     |                       | 34,021       | 24,151       | 27,297       | 30,374       | 31,497       | 29,096       | 23,938 | 35,736       |
| minimum           |                  |                     |                       | 25,818       | 22,332       | 22,812       | 27,012       | 25,999       | 24,350       | 21,082 | 31,008       |
| NTC <sup>d</sup>  |                  |                     |                       | Undetermined | Undetermined | Undetermined | Undetermined | Undetermined | Undetermined | 33,760 | Undetermined |
| NRTC <sup>e</sup> |                  |                     |                       | Undetermined | Undetermined | Undetermined | Undetermined | Undetermined | Undetermined | 32,875 | Undetermined |

<sup>a</sup> 2w: 2-week-old, 4w: 4-week-old, 9w: 9-week-old

<sup>b</sup> F: female, M: male

<sup>c</sup> N: normal

<sup>d</sup> NTC: non-template control

<sup>e</sup> NRTC: no-reverse transcription control
