# Supplementary material for: Analysis of Different Approaches for the Selection of Reference Genes in RT-qPCR Experiments: A Case Study in Skeletal Muscle of Growing Mice
Source: MDPI journal article supplement (doi:10.3390/ijms18051060), 2017-05-16

**Figure S1:** Melting curves of potential reference genes and target genes under study. A single peak detected in the melting curves examination confirmed the amplification of unique products by each primer pair and no primer dimer formation.

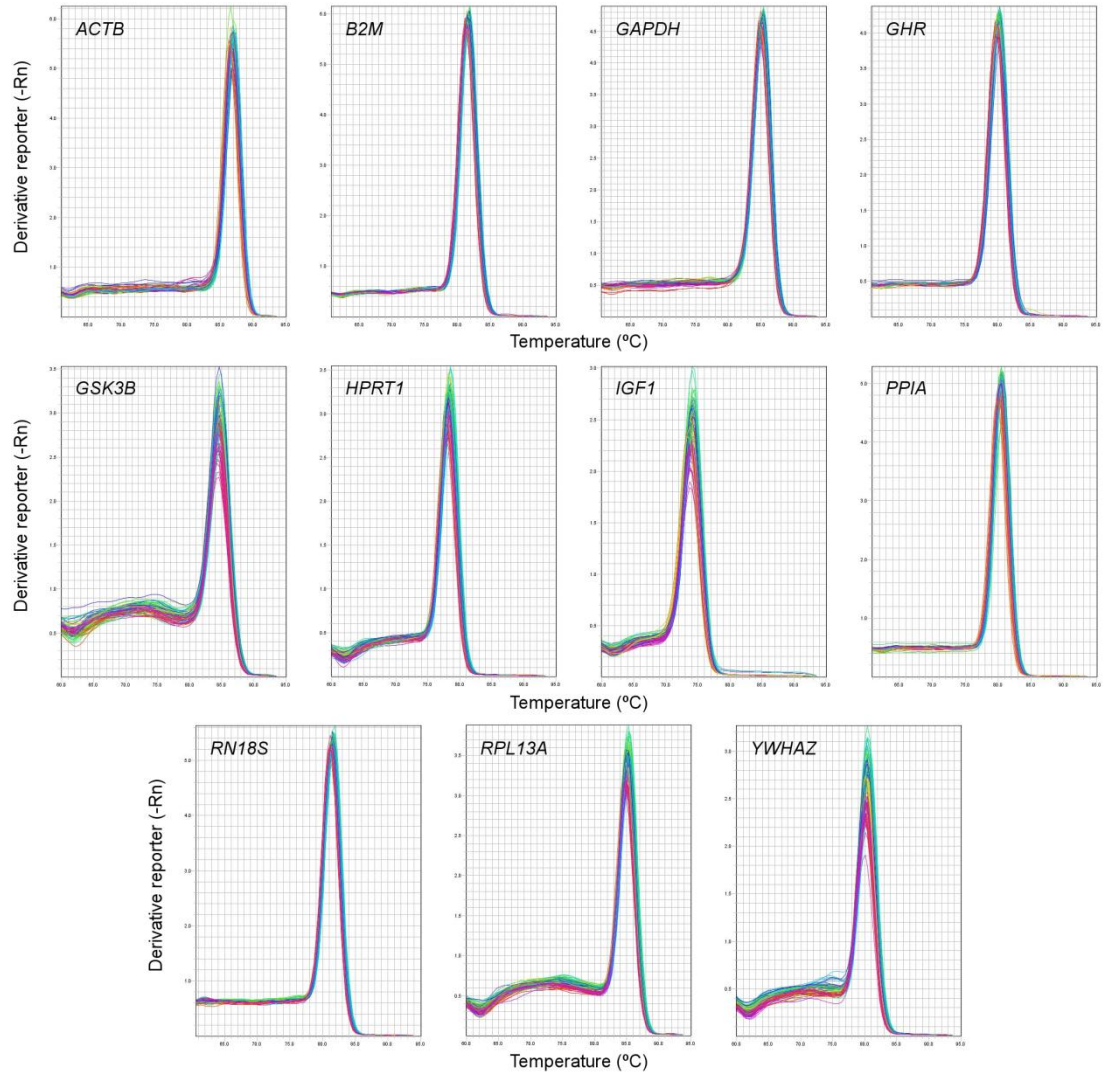

Supplement: s1 [file s1]
